# Supplementary material for: Genome-scale reconstructions of the mammalian secretory pathway predict metabolic costs and limitations of protein secretion
Source: PubMed Central journal article supplement (PMC6940358; doi:10.1038/s41467-019-13867-y), 2020-01-02
Supplement: 41467_2019_13867_MOESM2_ESM.pdf [file 41467_2019_13867_MOESM2_ESM.pdf]

## **Description of Additional Supplementary Files**

File Name: Supplementary Data 1

Description: Reactions, components, and vesicle stoichiometry used in mammalian secretory pathway reconstructions

File Name: Supplementary Data 2

Description: Protein Specific Information Matrices (PSIM) of human, mouse, and Chinese hamster

File Name: Supplementary Data 3

Description: Experimental data and IgG amino acid compositions used to constrain iCHO2048s

File Name: Supplementary Data 4

Description: In silico assessment of CHO cell productivity improvements upon host gene deletions
